# Supplementary material for: Sulfone-functionalized stereoisomeric [3]radialene displays guest induced modulation of porous frameworks and critical crystallization-induced near-infrared emission
Source: Royal Society of Chemistry journal article supplement (doi:10.1039/d5sc06925d), 2026-01-01
Supplement: d5sc06925d1.pdf [file d5sc06925d1.pdf]

## Supporting information

### **Sulfone-functionalized Stereoisomeric [3]Radialene Displays Guest-induced Modulation of Porous Frameworks and Critical Crystallization-induced Near-infrared Emission**

Gaoqiang Xu<sup>1,2</sup>, Ying Zhao<sup>1</sup>, Sheng Xie<sup>1,3\*</sup>, Zhibiao Zhou<sup>1,4</sup>, Ziyu Luo<sup>5</sup>, Haohao Liu<sup>1</sup>, Yang Zhang<sup>1</sup>, Zijie Qiu<sup>2</sup>, Anlian Pan<sup>5\*</sup>, Zebing Zeng<sup>1\*</sup>, Ben Zhong Tang<sup>2\*</sup>

<sup>1</sup>State Key Laboratory of Chemo and Biosensing, College of Chemistry and Chemical Engineering, Hunan University, Changsha 410082, China;

<sup>2</sup>Guangdong Basic Research Center of Excellence for Aggregate Science, School of Science and Engineering, Shenzhen Institute of Aggregate Science and Technology, The Chinese University of Hong Kong, Shenzhen (CUHK-Shenzhen), Guangdong 518172, China;

<sup>3</sup>Shenzhen Research Institute, Hunan University, Shenzhen 518000, China ;

<sup>4</sup>TCM and Ethnomedicine Innovation and Development International Laboratory, Innovative Materia Medica Research Institute, School of Pharmacy, Hunan University of Chinese Medicine, Changsha, China;

<sup>5</sup>Hunan Institute of Optoelectronic Integration, College of Materials Science and Engineering, Hunan University, Changsha 410082, China.

## Table of contents

|                                                                                                                                                                                                    |         |
|----------------------------------------------------------------------------------------------------------------------------------------------------------------------------------------------------|---------|
| <b>General methods</b> -----                                                                                                                                                                       | S3-S4   |
| <b>Synthetic procedure</b> -----                                                                                                                                                                   | S4-S5   |
| <b>Preparation for the single crystal sample</b> -----                                                                                                                                             | S5      |
| <b>Figure S1-S4 NMR spectra for TTR and TTRO</b> -----                                                                                                                                             | S6-S7   |
| <b>Figure S5-S6 HR mass spectra for TTR and TTRO</b> -----                                                                                                                                         | S8      |
| <b>Figure S7 Thermogravimetric analysis of Hex@TTRO polycrystalline solids</b> -----                                                                                                               | S9      |
| <b>Figure S8 Chiral isomers present in the Hex@TTRO crystal</b> -----                                                                                                                              | S9      |
| <b>Figure S9 Unit cell of Non@TTRO single crystal</b> -----                                                                                                                                        | S10     |
| <b>Figure S10 Crystal packing and void space of Hex@TTRO crystal</b> -----                                                                                                                         | S10     |
| <b>Figure S11 TTRO and Hexane packing mode in Hex@TTRO crystal</b> -----                                                                                                                           | S11     |
| <b>Figure S12 N<sub>2</sub> gas adsorption experiment</b> -----                                                                                                                                    | S11     |
| <b>Figure S13 PXRD spectra of TTRO polycrystalline samples</b> -----                                                                                                                               | S12     |
| <b>Figure S14 Intermolecular interaction of DMF/MeOH@TTRO crystal</b> -----                                                                                                                        | S12     |
| <b>Figure S15 Hirshfeld surface analysis of Hex@TTRO crystal</b> -----                                                                                                                             | S13     |
| <b>Figure S16 Hirshfeld surface analysis of DMF/MeOH@TTRO crystal</b> -----                                                                                                                        | S13     |
| <b>Figure S17 UV-vis absorption spectra of TTRO in different solvents</b> -----                                                                                                                    | S14     |
| <b>Figure S18 Molecular structure, molecular orbital of TTR and TTRO</b> -----                                                                                                                     | S14     |
| <b>Figure S19 PL spectra of Hex@TTRO crystal sample</b> -----                                                                                                                                      | S15     |
| <b>Figure S20 Intermolecular <math>\pi</math>-<math>\pi</math> interactions in Non@TTRO single crystal</b> -----                                                                                   | S15     |
| <b>Figure S21 Ultrafast time-resolved PL spectra of TTRO amorphous powder</b> -----                                                                                                                | S15     |
| <b>Figure S22 IGMH and electron density differences maps</b> -----                                                                                                                                 | S16     |
| <b>Table S1-S4 Crystallographic data for TTRO</b> -----                                                                                                                                            | S16-S20 |
| <b>Table S5 Selected Dihedral angle in four single crystal structures of TTRO</b> -----                                                                                                            | S20     |
| <b>Table S6 Selected bond length in four single crystal structures of TTRO</b> -----                                                                                                               | S20     |
| <b>Table S7 Photophysical properties of different TTRO crystals</b> -----                                                                                                                          | S21     |
| <b>Table S8 Photophysical behaviors for grounded and fumed TTRO samples</b> -----                                                                                                                  | S21     |
| <b>Figure S23 QM/MM model of TTRO for Hex@TTRO as an example</b> -----                                                                                                                             | S21     |
| <b>Figure S24 Molecular orbital and energy levels, transition property of the S<sub>1</sub> and the oscillator strengths at the S<sub>0</sub>-geometry in the gas and crystalline phases</b> ----- | S22     |
| <b>Table S9 Vertical transition energy (E) and oscillator strength (f) and transition orbitals (TOs) of TTRO at the S<sub>0</sub>-geometry in both the gas and solid phases</b> -----              | S22     |
| <b>Table S10 Vertical transition energy (E) and oscillator strength (f) and transition orbitals (TOs) of TTRO at the S<sub>1</sub>-geometry in both the gas and solid phases</b> -----             | S23     |
| <b>References</b> -----                                                                                                                                                                            | S23-S24 |

## General methods

All Solvents were purified and dried by standard methods prior to use. Other commercially available reagents were used without further purification unless otherwise noted. Reactions were monitored by thin layer chromatography (TLC) using silica gel GF254 plates with UV light to visualize the course of reaction and column chromatography was generally performed on silica gel (200-300 mesh).  $^1\text{H}$  and  $^{13}\text{C}$  NMR spectra were recorded on a Bruker 400 MHz spectrometer. The following abbreviations were used to explain the multiplicities: s = singlet, d = doublet, t = triplet, m = multiplet. Absorption spectra were recorded on a SHIMADZU UV-3600 plus. Photoluminescence spectra were recorded on Edinburgh FLS1000 spectrometer. The fluorescent quantum yields in solid state were measured using an integrating sphere by an Edinburgh FLS1000. High-resolution mass spectra (HRMS) were recorded on a Finnigan MAT TSQ 7000 spectrometer system operating in a MALDI-TOF mode. Photoluminescence decay traces were collected by employing time-correlated single-photon-counting (TCSPC) technique using an Edinburgh FLS1000 through a motorized monochromator. Solvent-accessible void spaces was estimated by Platon.<sup>S1</sup> TGA test was conducted on STA8000, the sample is first held at 40 °C in a nitrogen atmosphere for 1 hour, then cooled to room temperature. Next, it is heated to 800 °C at a rate of 5 °C/min while data is collected. BET test was conducted on AUTOSORB IQ, prior to data collection, the samples were degassed at 100 °C for 8 h. The aggregation effect was considered by using ONIOM method with QM and MM layers in Gaussian 16 program.<sup>S2</sup> The UFF force field was used with the restrained electrostatic potential (RESP) partial charges for the MM treatment. And the computation model for solid phase was built by digging a cluster from the X-ray crystal. All calculations of geometry optimizations and vibrational frequency for the ground state ( $S_0$ ) and the first excited state ( $S_1$ ) of gas phase were respectively studied by using the restricted density functional theory (DFT) and TD-DFT by B3lyp/6-31g(d,p) basis sets. A full Natural Bond Orbital (NBO) analysis have been done by Gaussian16 program to give a clear view on electronic population, and the analysis data of molecular orbital composition were generated by Multiwfn package.<sup>S3-S4</sup> Based on the trimer structure within the crystal, we analyzed the electron density changes before and after molecular packing, along with the intermolecular interactions. The wave function of the trimer was computed at the B3LYP-D3/def2-SVP level using the ORCA 5.0 quantum chemistry package.<sup>S5-S8</sup> Theoretical analyses, including the study of weak intermolecular interactions via the Independent Gradient Model based on Hirshfeld partition (IGMH), as well as calculations of electron density differences, were performed using the Multiwfn 3.8(dev) program.<sup>S9</sup> All corresponding isosurface maps—such as electron density differences and non-covalent interactions—were generated with Multiwfn

3.8(dev) and rendered using VMD 1.9.3.<sup>S10</sup>

## Synthetic procedure

Compound thioxanthene was synthesized according to reported literature<sup>S11</sup>.

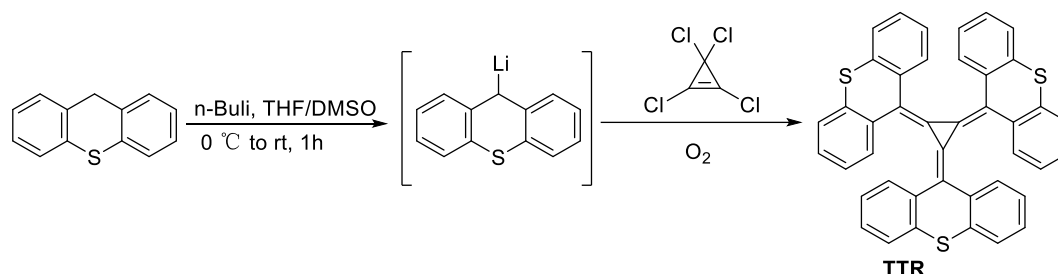

To a flame-dried 100 mL Schlenk tube, 10 mL dry THF and 10 mL dry DMSO was added under argon atmosphere. The solution was cooled to 0 °C and *n*-BuLi solution (1.6 M in *n*-hexane, 0.9 mL, 1.51 mmol) was slowly added. The mixture was stirred for 10 minutes at 0 °C. Afterwards, a solution of compound thioxanthene (300 mg, 1.51 mmol) in dry THF was added slowly and the mixture was stirred for 1 h at 0 °C. Then, **TCCP** (44.8 mg, 0.25 mmol) dissolved in 2.5 mL dry THF was added dropwise via syringe. The mixture was stirred at 0 °C for 30 min, then at room temperature for another 30 min, and again cooled to 0 °C. Oxygen was bubbled into the reaction for 30 min at 0 °C and another 30 min at room temperature. Then, water (50 mL) was added into the reaction and the mixture was extracted with DCM (3 × 50 mL). The organic phase was dried over Na<sub>2</sub>SO<sub>4</sub>. The solvent was removed under vacuum and the residue was further purified by chromatography using silica-gel (Petroleum ether/CH<sub>2</sub>Cl<sub>2</sub> = 10:1, *R<sub>f</sub>* = 0.5) to afford **TTR** (42.5 mg, 27%). <sup>1</sup>H NMR (400 MHz, CDCl<sub>3</sub>) δ 7.38 (d, *J* = 7.7 Hz, 6H), 7.09 (t, *J* = 7.6 Hz, 6H), 6.86 (d, *J* = 7.8 Hz, 6H), 6.47 (t, *J* = 7.6 Hz, 6H). <sup>13</sup>C NMR (100 MHz, CDCl<sub>3</sub>) δ 134.8, 132.6, 130.3, 127.0, 125.1, 124.8, 119.8, 116.5. HRMS (MALDI-TOF, *m/z*) calcd for C<sub>42</sub>H<sub>24</sub>S<sub>3</sub><sup>+</sup> [*M*]<sup>+</sup> = 624.1040; found 624.1042 (error = +0.32 ppm).

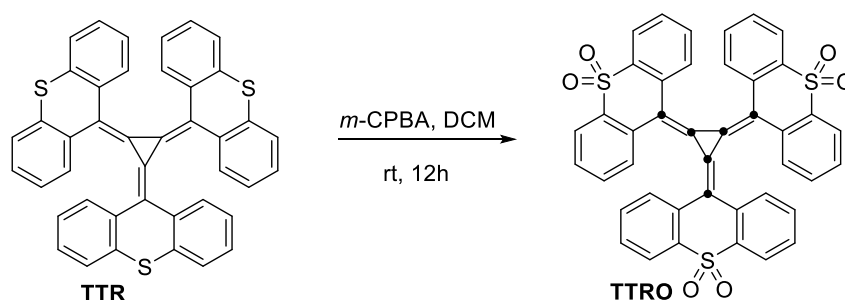

Compound **TTR** (90 mg, 0.14 mmol) and *m*-CPBA (149.3 mg, 0.87 mmol) were added under an argon atmosphere. Then, 30 mL dry DCM was added and the reaction was stirred 12 h at room temperature. Then, the reaction mixture was washed with saturated sodium bicarbonate solution (3 × 50 mL). The organic phase was dried over Na<sub>2</sub>SO<sub>4</sub>. The solvent was removed under vacuum and the residue was further purified

chromatography using silica-gel (Petroleum ether/EA = 3:1,  $R_f$  = 0.4) to afford **TTRO** (95.3 mg, 92%).  $^1\text{H}$  NMR (400 MHz,  $\text{CDCl}_3$ )  $\delta$  8.17 (d,  $J$  = 7.3 Hz, 6H), 7.46 (t,  $J$  = 7.9 Hz, 6H), 7.09 (d,  $J$  = 7.7 Hz, 6H), 6.99 (t,  $J$  = 6.8 Hz, 6H).  $^{13}\text{C}$  NMR (100 MHz,  $\text{CDCl}_3$ )  $\delta$  136.4, 135.8, 130.9, 130.0, 129.1, 123.5, 121.4, 116.5. HRMS (MALDI-TOF,  $m/z$ ) calcd for  $\text{C}_{42}\text{H}_{24}\text{NaO}_6\text{S}_3^+$  [ $\text{M}+\text{Na}^+$ ] = 743.0627; found 743.0625 (error = -0.27 ppm).

### Preparation for the single crystal sample

**Hex@TTRO**: At room temperature, n-hexane was allowed to slowly diffuse into a chloroform solution of **TTRO** (20 mg/mL), and the corresponding crystalline samples were obtained after approximately two days.

**THF@TTRO**: At room temperature, cyclohexane was allowed to slowly diffuse into a THF solution of **TTRO** (20 mg/mL), and the corresponding crystalline samples were obtained after approximately seven days.

**Non@TTRO** and **DMF/MeOH@TTRO**: 15 mL of DMF and 3 mL of methanol were added to a sample vial and mixed thoroughly, followed by the addition of 30 mg of **TTRO**. The mixture was sonicated until complete dissolution was achieved and then left to stand at room temperature for approximately one month, affording the corresponding two types of single-crystal samples.

# <sup>1</sup>H and <sup>13</sup>C NMR spectra

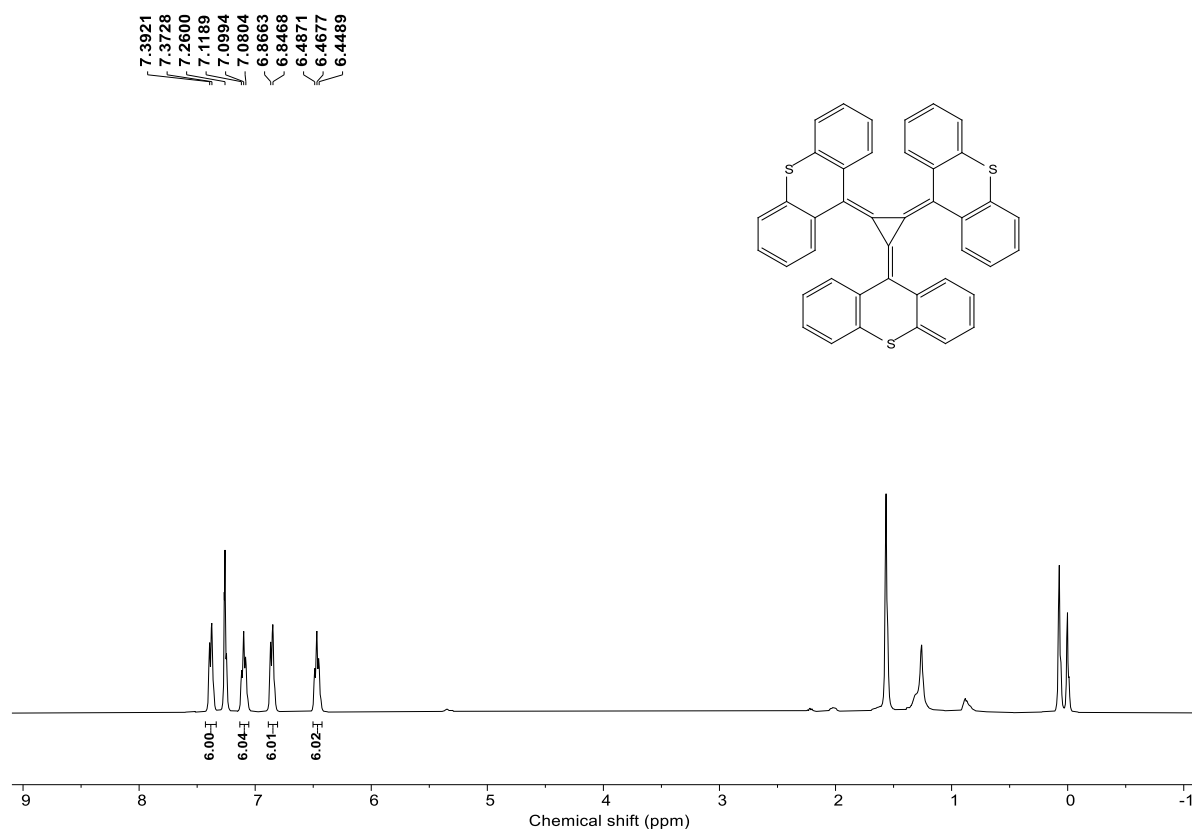

**Figure S1.** <sup>1</sup>H NMR spectrum (400 MHz) of compound **TTR** in CDCl<sub>3</sub> at 298 K.

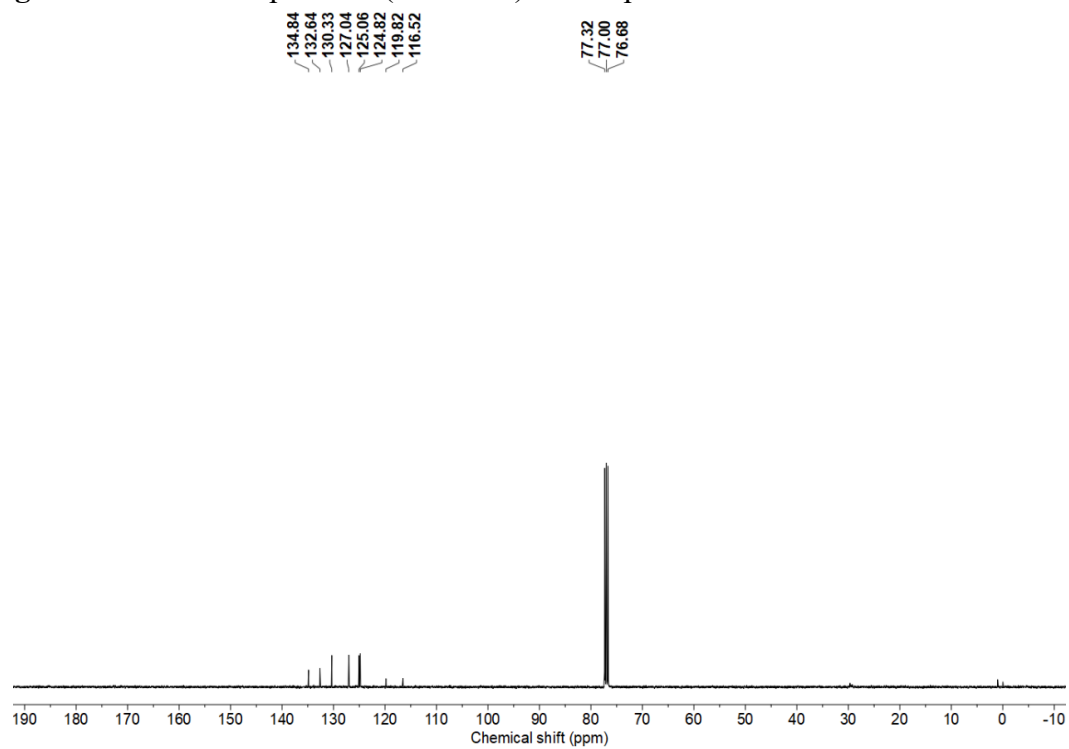

**Figure S2.** <sup>13</sup>C NMR spectrum (100 MHz) of compound **TTR** in CDCl<sub>3</sub> at 298 K.

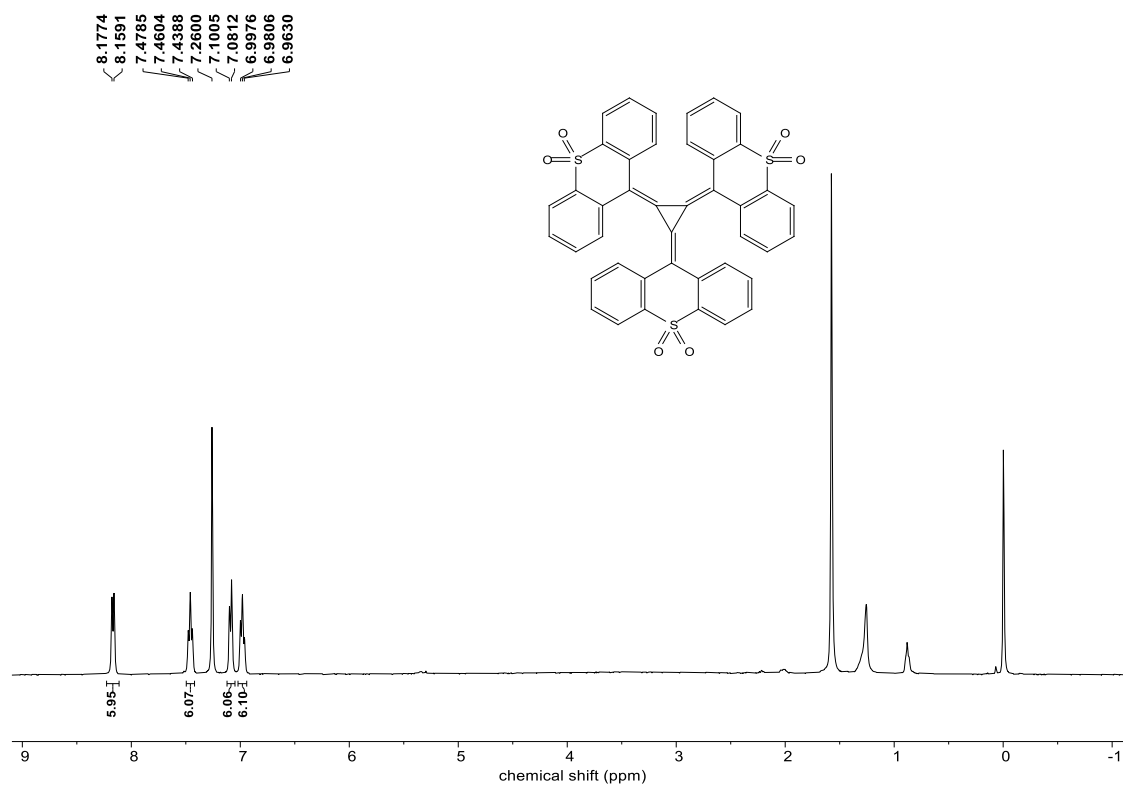

**Figure S3.** <sup>1</sup>H NMR spectrum (400 MHz) of compound **TTRO** in CDCl<sub>3</sub> at 298 K.

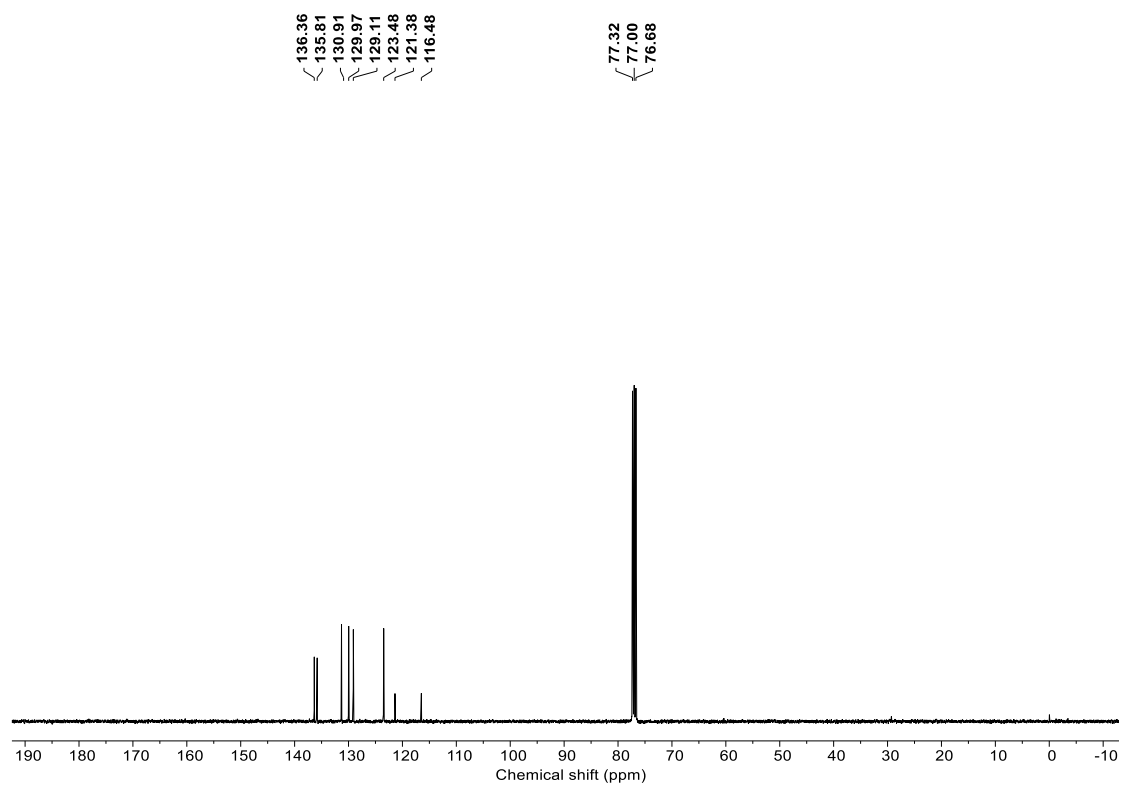

**Figure S4.** <sup>13</sup>C NMR spectrum (100 MHz) of compound **TTRO** in CDCl<sub>3</sub> at 298 K.

## HR-MS spectra

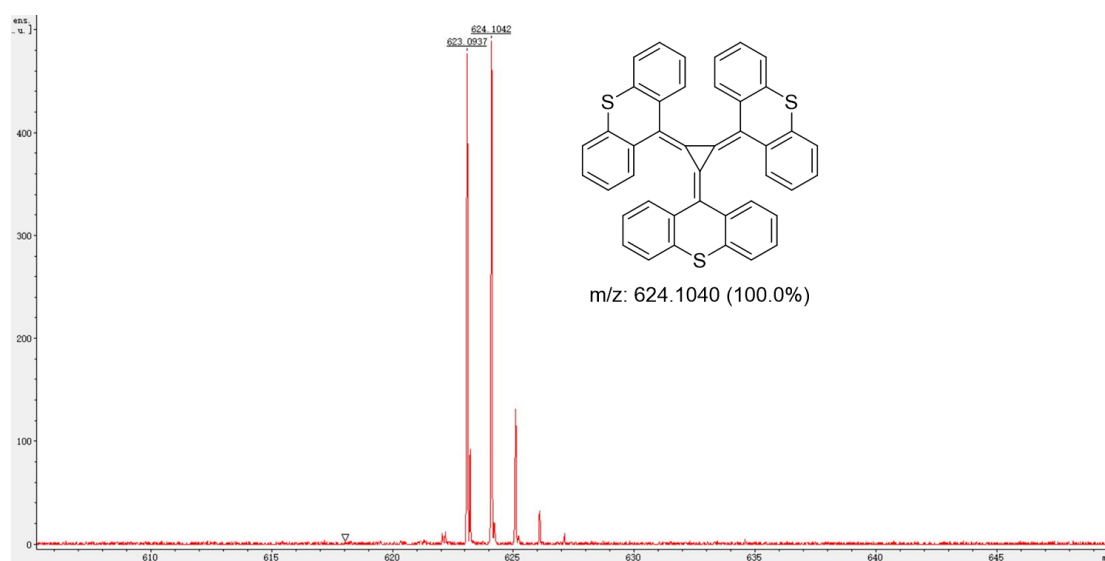

**Figure S5.** HR-MS of compound TTR.

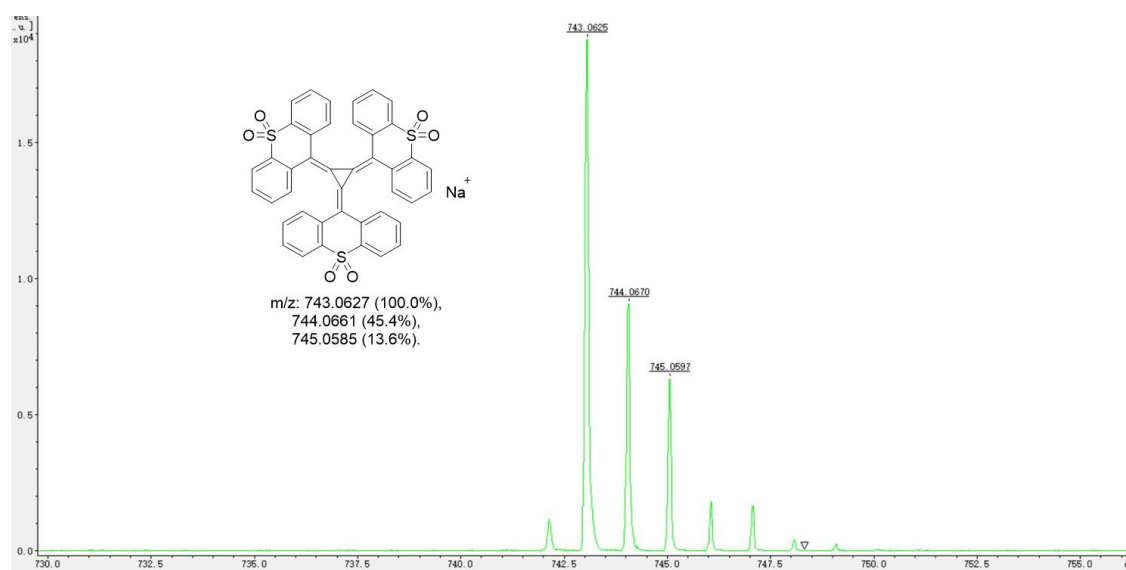

**Figure S6.** HR-MS of compound TTRO.



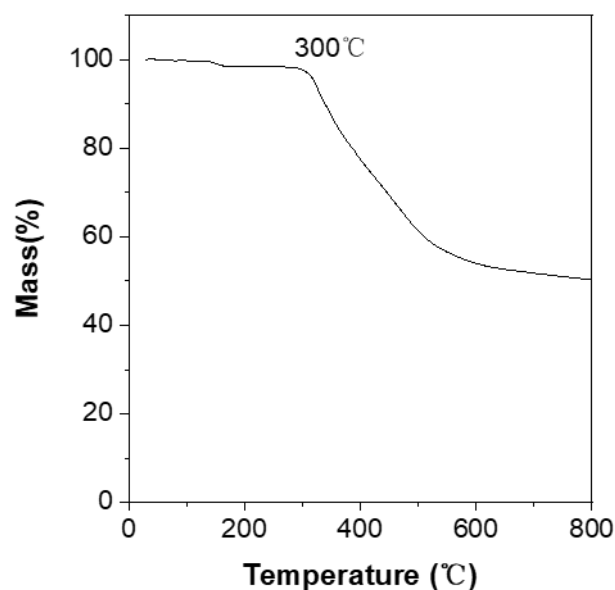

**Figure S7.** Thermogravimetric analysis (TGA) of **Hex@TTRO** polycrystalline solids

**Note:** The preparation method for polycrystalline samples **TTRO** used in TGA and nitrogen adsorption tests differs from that of single crystal cultivation. Specifically, a saturated chloroform solution of **TTRO** is slowly added to *n*-hexane, resulting in the formation of polycrystalline samples of **TTRO** immediately. Powder XRD testing further confirmed the consistency of its stacking structure with the single crystal samples (**Figure S13**).

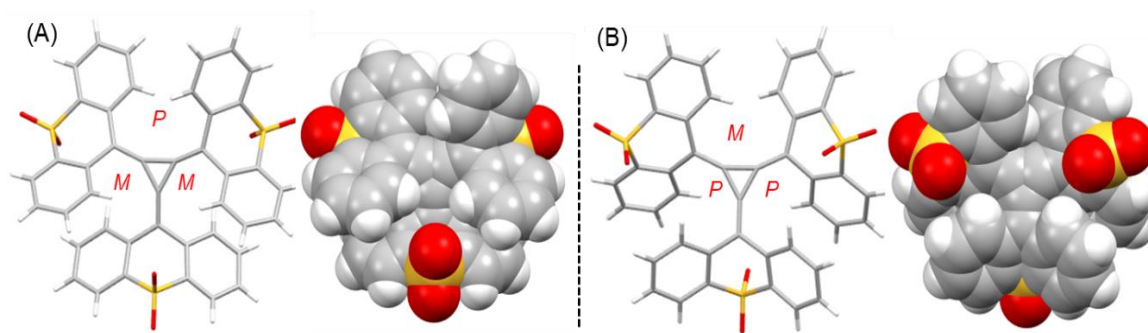

**Figure S8.** Chiral isomers present in the **Hex@TTRO** single crystal and corresponding spacefill mode.

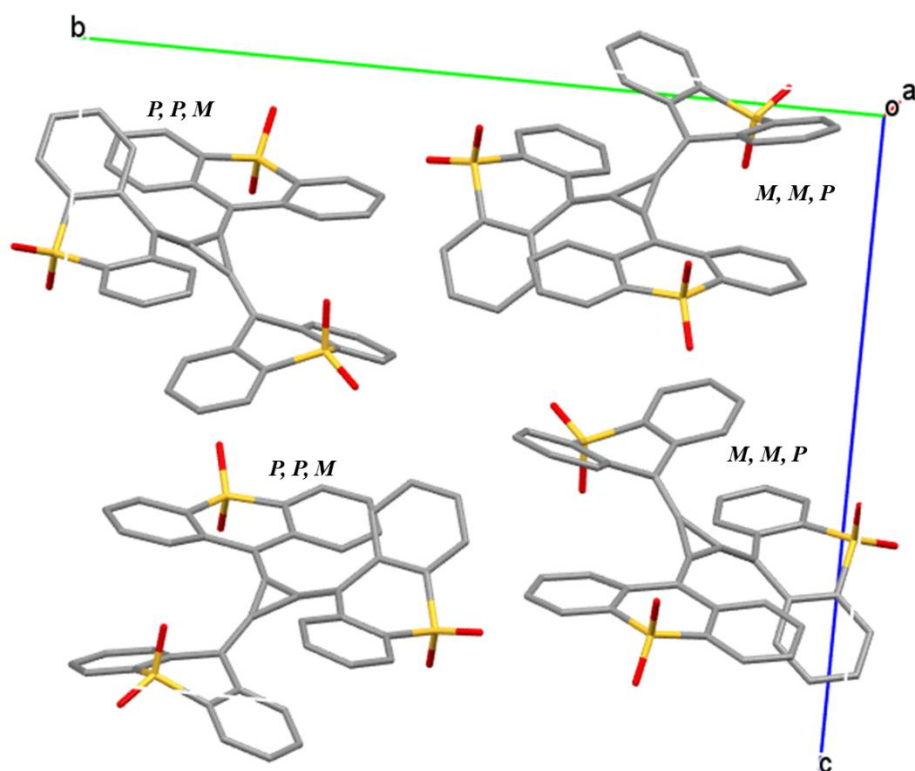

**Figure S9.** Unit cell of **Non@TTRO** single crystal containing two pairs of *P/M* isomers.

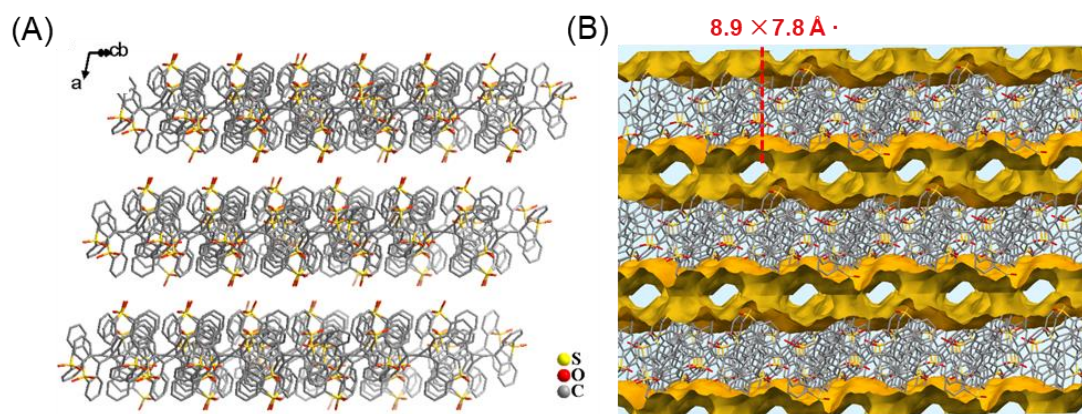

**Figure S10.** Crystal packing (A) and void space (B) of **Hex@TTRO**. This pore structure is in the same horizontal direction as Figure 2E-2F but viewed from a different angle.

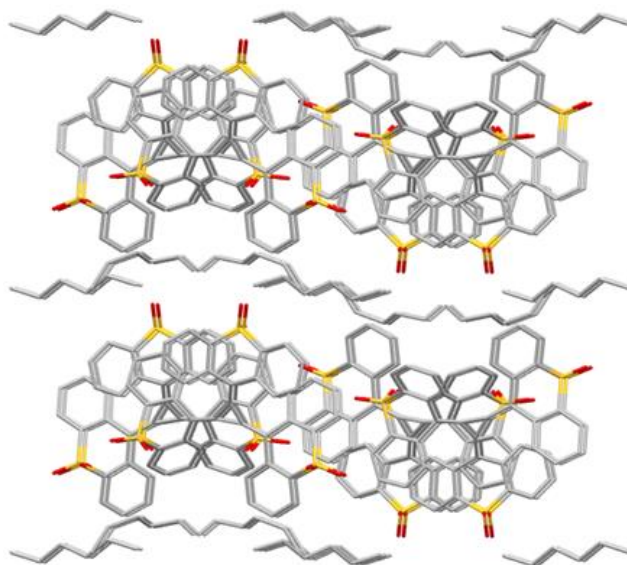

**Figure S11.** TTRO and Hexane packing mode in **Hex@TTRO** crystal.

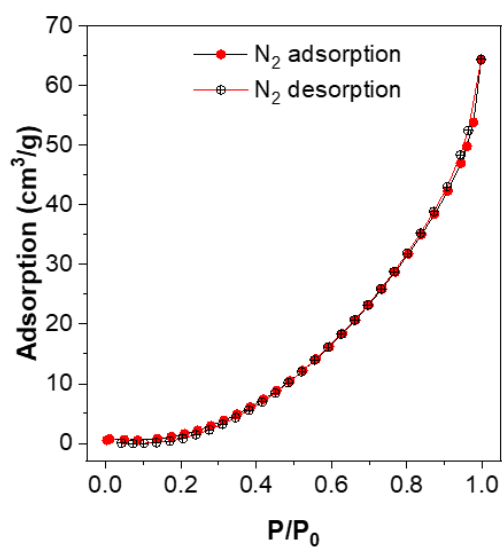

**Figure S12.** N<sub>2</sub> gas adsorption and desorption isotherm of **Hex@TTRO** polycrystalline solids.

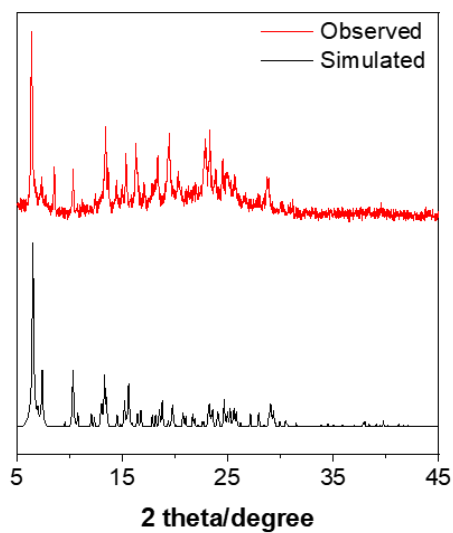

**Figure S13.** Simulated and experimental PXRD spectra of **TTRO** polycrystalline samples obtained from  $\text{CHCl}_3$ /Hexane chemical environment.

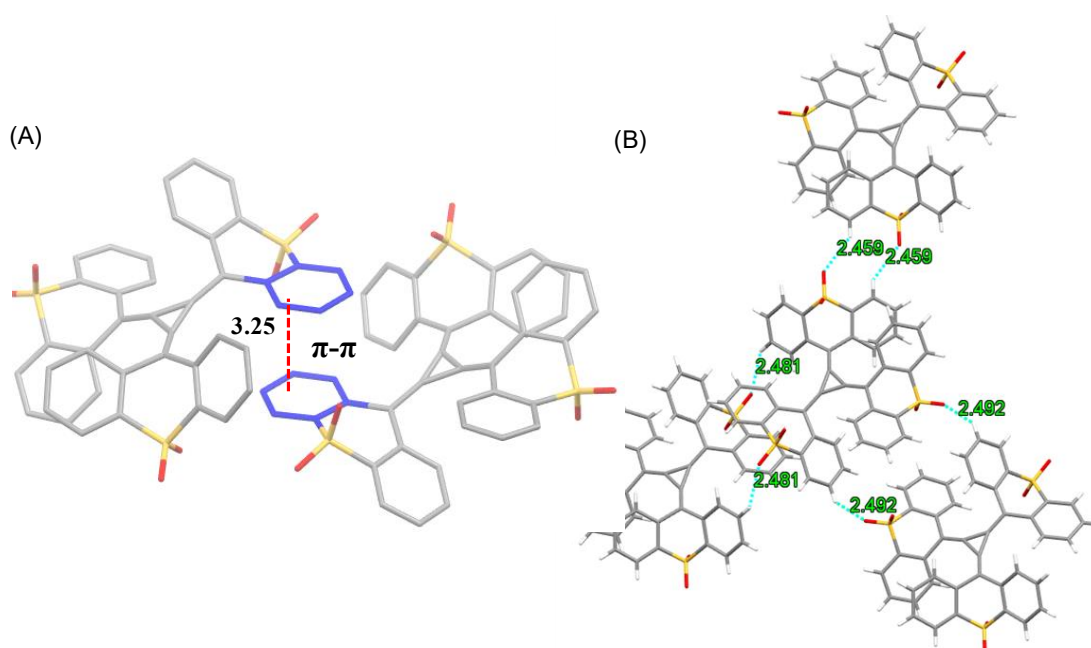

**Figure S14.** Intermolecular  $\pi$ - $\pi$  (A) and C-H $\cdots$ O (B) interactions in **DMF/MeOH@TTRO** single crystal.

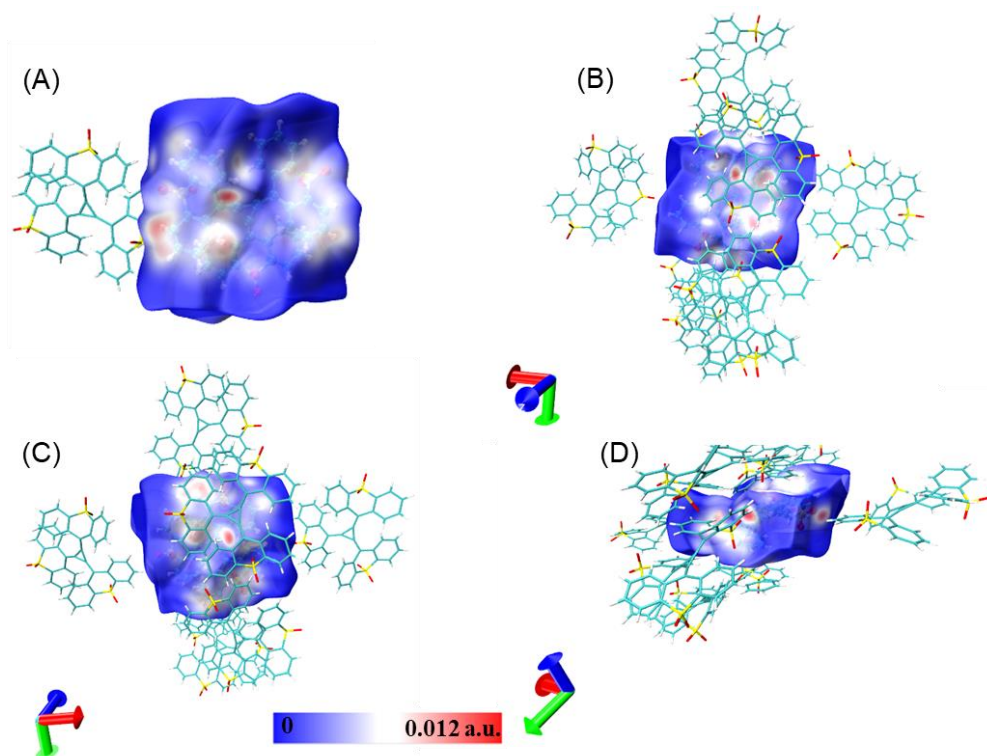

**Figure S15.** Hirshfeld surface analysis of **Hex@TTRO** crystal viewed from different direction.

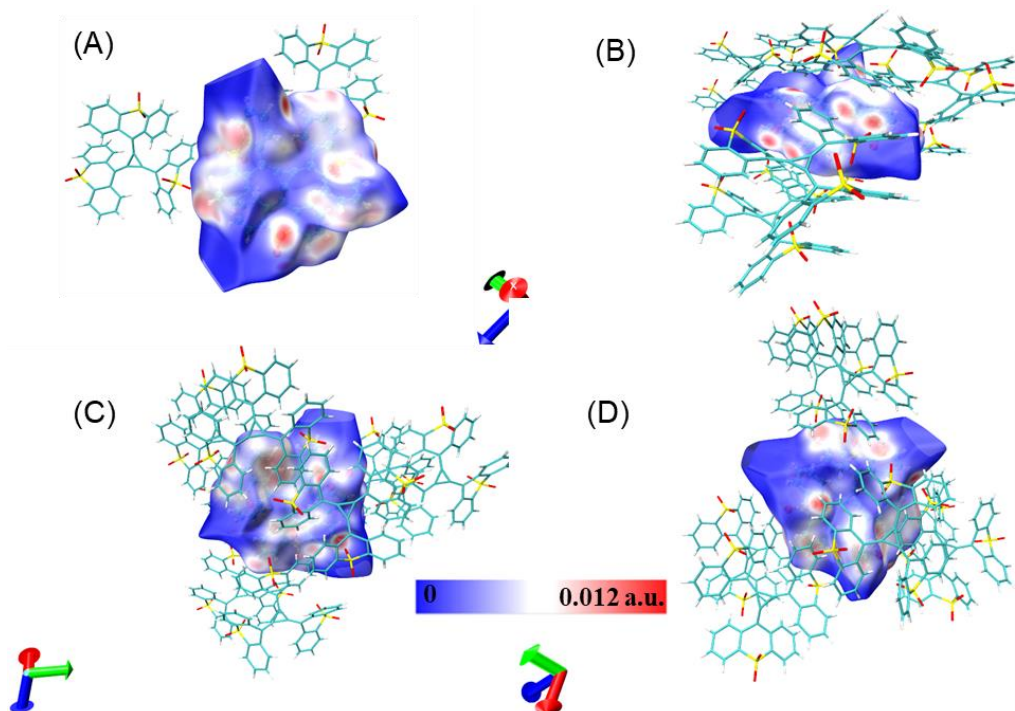

**Figure S16.** Hirshfeld surface analysis of **DMF/MeOH@TTRO** crystal viewed from different direction.



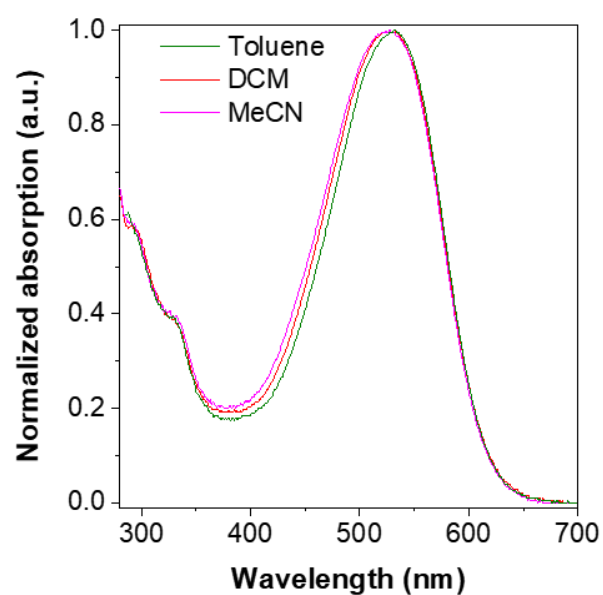

**Figure S17.** UV-vis absorption spectra of **TTRO** in different solvents.

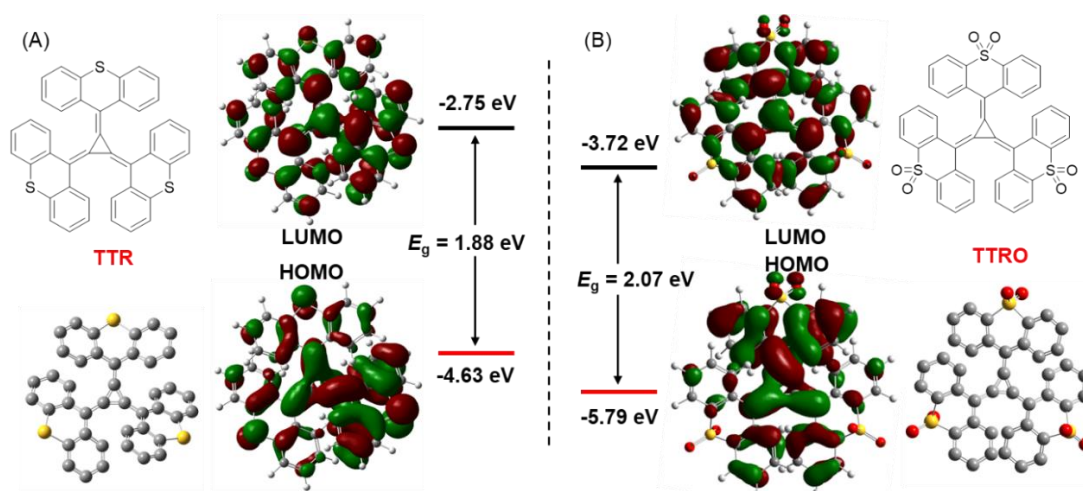

**Figure S18.** Molecular structure and molecular orbital amplitude plots of the HOMO (bottom) and LUMO (top) energy levels of **TTR** (A) and **TTRO** (B) calculated at the B3LYP/6-31G(d,p) level on basis of optimized structures.

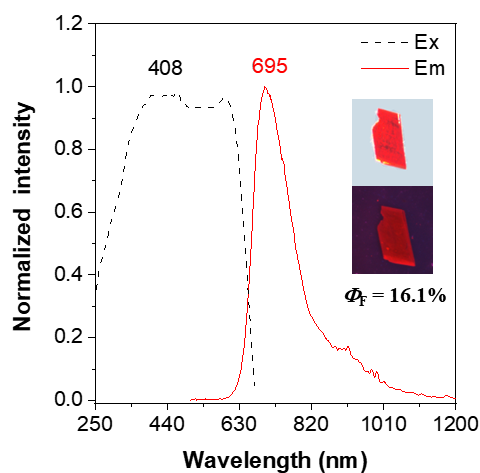

**Figure S19.** Normalized exciton and emission PL spectra of **Hex@TTRO** crystal sample.

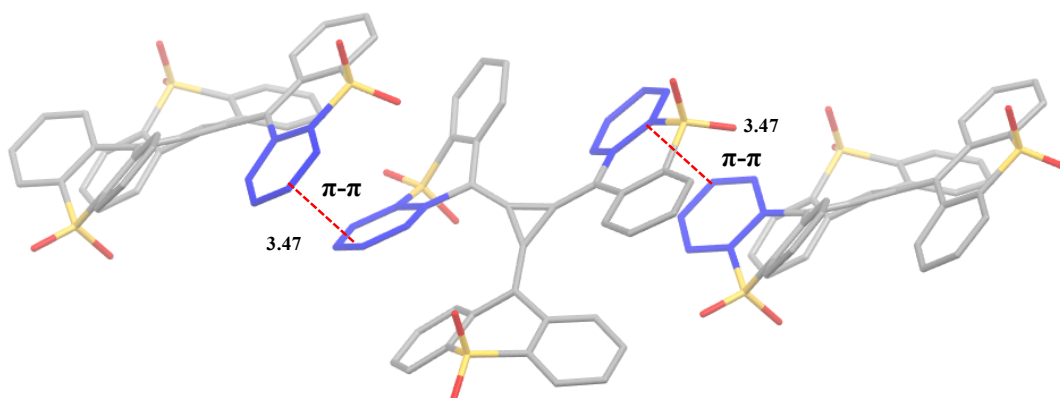

**Figure S20.** Intermolecular  $\pi$ - $\pi$  interactions in **Non@TTRO** single crystal.

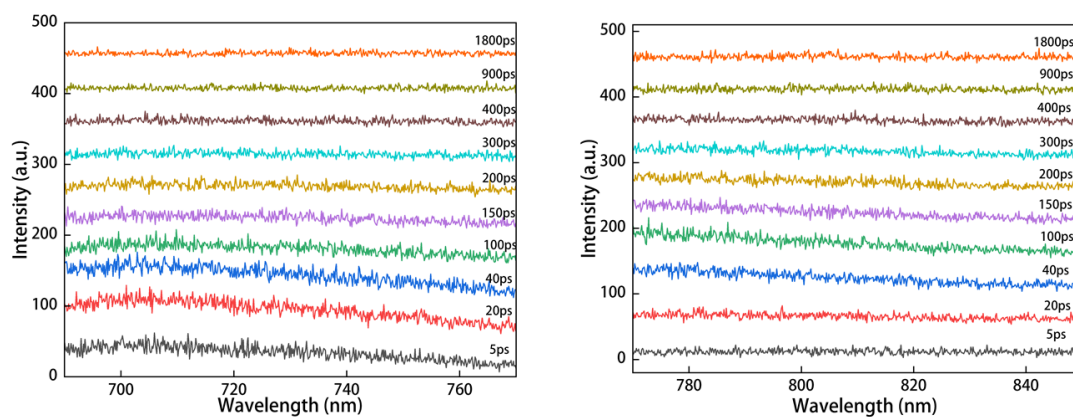

**Figure S21.** Ultrafast time-resolved PL spectra of **TTRO** amorphous powder collecting different emission wavelength range.

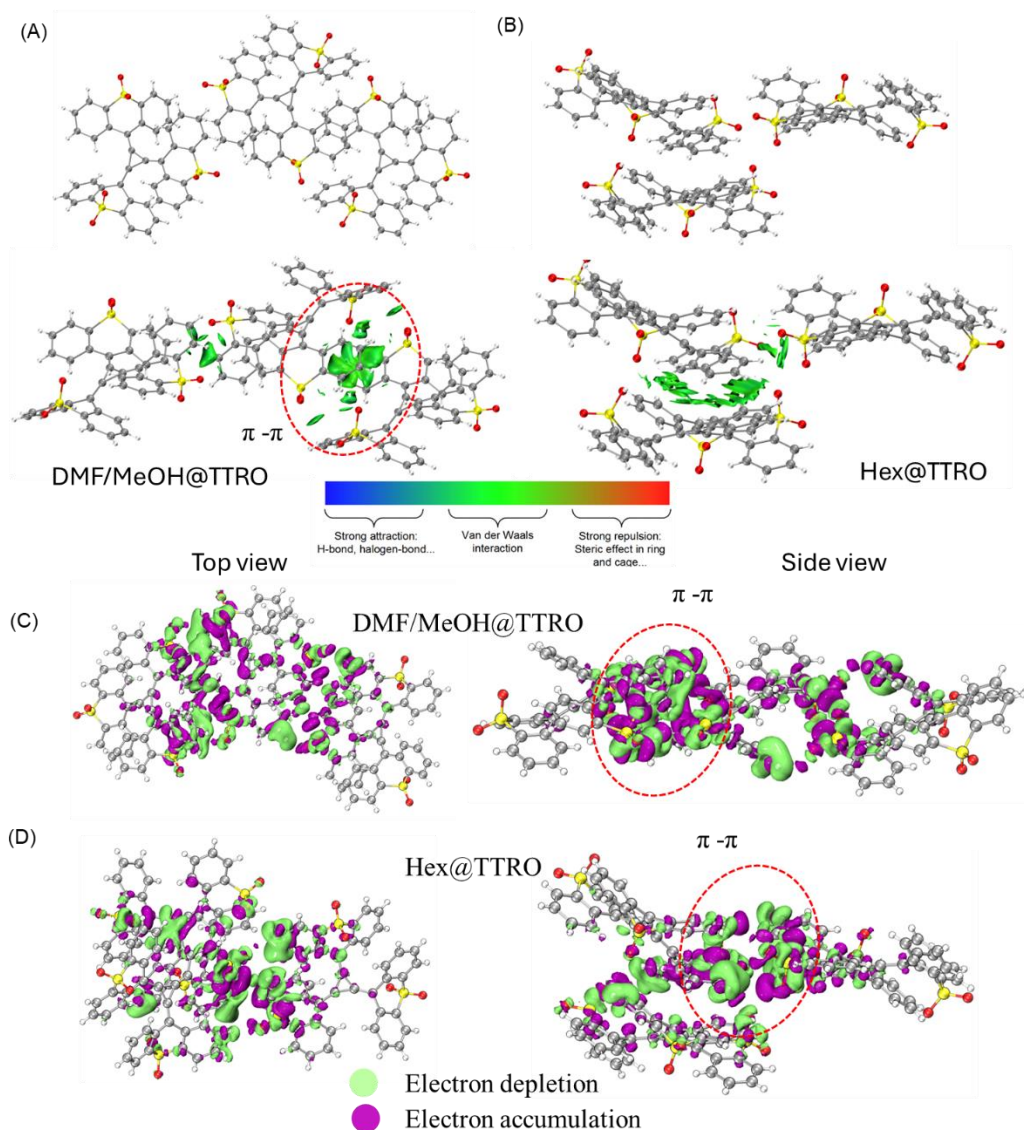

**Figure S22.** (A), (B) Trimer packing mode obtained from single crystal structure and study of weak intermolecular interactions via the Independent Gradient Model based on Hirshfeld partition (IGMH) for **DMF/MeOH@TTRO** (A), **Hex@TTRO** (B). Calculated Electron density differences maps between single molecule structure and trimer structure, **DMF/MeOH@TTRO** (C), **Hex@TTRO** (D).

## Crystallographic data

**Table S1** Crystal data and structure refinement of **Non@TTRO** (CCDC: 2476304).

|                   |                               |
|-------------------|-------------------------------|
| Empirical formula | $C_4H_{2.29}O_{0.57}S_{0.29}$ |
| Formula weight    | 68.65                         |
| Temperature/K     | 273(2)                        |
| Crystal system    | monoclinic                    |
| Space group       | $P2_1/n$                      |



|                                             |                                                               |
|---------------------------------------------|---------------------------------------------------------------|
| a/Å                                         | 7.868(4)                                                      |
| b/Å                                         | 22.623(15)                                                    |
| c/Å                                         | 18.246(13)                                                    |
| $\alpha$ /°                                 | 90                                                            |
| $\beta$ /°                                  | 94.783(14)                                                    |
| $\gamma$ /°                                 | 90                                                            |
| Volume/Å <sup>3</sup>                       | 3236(3)                                                       |
| Z                                           | 42                                                            |
| $\rho$ calcg/cm <sup>3</sup>                | 1.479                                                         |
| $\mu$ /mm <sup>-1</sup>                     | 0.283                                                         |
| F(000)                                      | 1488.0                                                        |
| Crystal size/mm <sup>3</sup>                | 0.22 × 0.19 × 0.18                                            |
| Radiation                                   | MoK $\alpha$ ( $\lambda$ = 0.71073)                           |
| 2 $\Theta$ range for data collection/°      | 4.48 to 56.62                                                 |
| Index ranges                                | -9 ≤ h ≤ 10, -30 ≤ k ≤ 30, -24 ≤ l ≤ 23                       |
| Reflections collected                       | 42661                                                         |
| Independent reflections                     | 8057 [R <sub>int</sub> = 0.0406, R <sub>sigma</sub> = 0.0322] |
| Data/restraints/parameters                  | 8057/0/536                                                    |
| Goodness-of-fit on F <sup>2</sup>           | 1.079                                                         |
| Final R indexes [ $I \geq 2\sigma(I)$ ]     | R <sub>1</sub> = 0.0439, wR <sub>2</sub> = 0.1082             |
| Final R indexes [all data]                  | R <sub>1</sub> = 0.0574, wR <sub>2</sub> = 0.1186             |
| Largest diff. peak/hole / e Å <sup>-3</sup> | 1.22/-0.58                                                    |

**Table S2** Crystal data and structure refinement of **Hex@TTRO** (CCDC: 2476305).

|                        |                                                                                                                            |
|------------------------|----------------------------------------------------------------------------------------------------------------------------|
| Empirical formula      | C <sub>42</sub> H <sub>24</sub> O <sub>6</sub> S <sub>3</sub>                                                              |
| Formula weight         | 720.79                                                                                                                     |
| Temperature            | 213 K                                                                                                                      |
| Wavelength             | 0.71073 Å                                                                                                                  |
| Crystal system         | Monoclinic                                                                                                                 |
| Space group            | P12 <sub>1</sub> /c <sub>1</sub>                                                                                           |
| Unit cell dimensions   | a = 14.4113(4) Å $\alpha$ /° = 90°.<br>b = 25.3415(8) Å $\beta$ /° = 109.4130(10)°.<br>c = 12.3572(4) Å $\gamma$ /° = 90°. |
| Volume                 | 4256.3(2) Å <sup>3</sup>                                                                                                   |
| Z                      | 4                                                                                                                          |
| Density (calculated)   | 1.125 Mg/m <sup>3</sup>                                                                                                    |
| Absorption coefficient | 0.215 mm <sup>-1</sup>                                                                                                     |

|                                               |                                             |
|-----------------------------------------------|---------------------------------------------|
| F(000)                                        | 1488                                        |
| Crystal size                                  | 0.2 x 0.15 x 0.13 mm <sup>3</sup>           |
| Theta range for data collection               | 2.197 to 25.998°.                           |
| Index ranges                                  | -17<=h<=17, -31<=k<=31, -15<=l<=15          |
| Reflections collected                         | 43143                                       |
| Independent reflections                       | 8341 [R(int) = 0.0353]                      |
| Completeness to theta = 25.242°               | 99.6 %                                      |
| Absorption correction                         | Semi-empirical from equivalents             |
| Max. and min. transmission                    | 0.7456 and 0.6531                           |
| Refinement method                             | Full-matrix least-squares on F <sup>2</sup> |
| Data / restraints / parameters                | 8341 / 0 / 460                              |
| Goodness-of-fit on F <sup>2</sup>             | 1.169                                       |
| Final R indices [I>2sigma(I)]                 | R1 = 0.0446, wR2 = 0.1499                   |
| R indices (all data)                          | R1 = 0.0554, wR2 = 0.1600                   |
| Extinction coefficient                        | n/a                                         |
| Largest diff. peak and hole e.Å <sup>-3</sup> | 0.230 and -0.315                            |

**Table S3** Crystal data and structure refinement **THF@TTRO** (CCDC: 2476306).

|                                 |                                                               |                  |
|---------------------------------|---------------------------------------------------------------|------------------|
| Empirical formula               | C <sub>44</sub> H <sub>28</sub> O <sub>7</sub> S <sub>3</sub> |                  |
| Formula weight                  | 764.84                                                        |                  |
| Temperature                     | 296(2) K                                                      |                  |
| Wavelength                      | 0.71073 Å                                                     |                  |
| Crystal system                  | Monoclinic                                                    |                  |
| Space group                     | P2 <sub>1</sub> /c                                            |                  |
| Unit cell dimensions            | a = 14.864(2) Å                                               | a = 90°.         |
|                                 | b = 25.267(4) Å                                               | b = 109.556(4)°. |
|                                 | c = 12.5224(18) Å                                             | g = 90°.         |
| Volume                          | 4431.8(11) Å <sup>3</sup>                                     |                  |
| Z                               | 4                                                             |                  |
| Density (calculated)            | 1.146 Mg/m <sup>3</sup>                                       |                  |
| Absorption coefficient          | 0.212 mm <sup>-1</sup>                                        |                  |
| F(000)                          | 1584                                                          |                  |
| Crystal size                    | 0.200 x 0.200 x 0.200 mm <sup>3</sup>                         |                  |
| Theta range for data collection | 2.016 to 24.998°.                                             |                  |
| Index ranges                    | -17<=h<=15, -30<=k<=28, -14<=l<=14                            |                  |
| Reflections collected           | 68148                                                         |                  |

|                                   |                                             |
|-----------------------------------|---------------------------------------------|
| Independent reflections           | 7794 [R(int) = 0.1421]                      |
| Completeness to theta = 24.998°   | 99.9 %                                      |
| Absorption correction             | Semi-empirical from equivalents             |
| Refinement method                 | Full-matrix least-squares on F <sup>2</sup> |
| Data / restraints / parameters    | 7794 / 47 / 505                             |
| Goodness-of-fit on F <sup>2</sup> | 0.994                                       |
| Final R indices [I>2sigma(I)]     | R1 = 0.0901, wR2 = 0.2436                   |
| R indices (all data)              | R1 = 0.1870, wR2 = 0.2939                   |
| Extinction coefficient            | n/a                                         |
| Largest diff. peak and hole       | 0.698 and -0.448 e.Å <sup>-3</sup>          |

**Table S4** Crystal data and structure refinement of **DMF/MeOH@TTRO** (CCDC: 2476303).

|                                    |                                                               |
|------------------------------------|---------------------------------------------------------------|
| Empirical formula                  | C <sub>42</sub> H <sub>24</sub> O <sub>6</sub> S <sub>3</sub> |
| Formula weight                     | 720.79                                                        |
| Temperature/K                      | 100.01(10)                                                    |
| Crystal system                     | triclinic                                                     |
| Space group                        | P-1                                                           |
| a/Å                                | 7.18920(10)                                                   |
| b/Å                                | 16.6927(4)                                                    |
| c/Å                                | 17.5904(4)                                                    |
| α/°                                | 66.493(2)                                                     |
| β/°                                | 89.947(2)                                                     |
| γ/°                                | 89.447(2)                                                     |
| Volume/Å <sup>3</sup>              | 1935.69(7)                                                    |
| Z                                  | 2                                                             |
| ρ <sub>calc</sub> /cm <sup>3</sup> | 1.237                                                         |
| μ/mm <sup>-1</sup>                 | 2.121                                                         |
| F(000)                             | 744.0                                                         |
| Crystal size/mm <sup>3</sup>       | 0.3 × 0.2 × 0.1                                               |
| Radiation                          | Cu Kα (λ = 1.54184)                                           |
| 2θ range for data collection/°     | 5.478 to 133.184                                              |
| Index ranges                       | -8 ≤ h ≤ 8, -19 ≤ k ≤ 19, -20 ≤ l ≤ 20                        |
| Reflections collected              | 26396                                                         |
| Independent reflections            | 6832 [Rint = 0.0343, Rsigma = 0.0305]                         |

|                                                |                         |
|------------------------------------------------|-------------------------|
| Data/restraints/parameters                     | 6832/153/460            |
| Goodness-of-fit on $F^2$                       | 1.049                   |
| Final R indexes [ $I \geq 2\sigma(I)$ ]        | R1= 0.0419, wR2= 0.1002 |
| Final R indexes [all data]                     | R1= 0.0464, wR2= 0.1018 |
| Largest diff. peak/hole / $e \text{ \AA}^{-3}$ | 0.51/-0.55              |

**Table S5.** Selected Dihedral angle in four single crystal structures of **TTRO**.

| 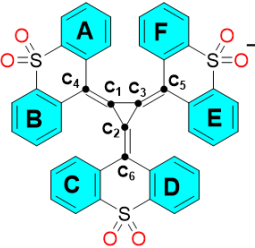 | Dihedral angle | A,B    | C,D    | E,F    |
|-----------------------------------------------------------------------------------|----------------|--------|--------|--------|
|                                                                                   | Hex@TTRO       | 26.2 ° | 43.2 ° | 51.3 ° |
|                                                                                   | THF@TTRO       | 25.4 ° | 44.0 ° | 50.9 ° |
|                                                                                   | DMF/MeOH@TTRO  | 35.9 ° | 44.9 ° | 49.2 ° |
|                                                                                   | Non@TTRO       | 13.9 ° | 44.4 ° | 38.4 ° |

**Table S6.** Selected bond length in four single crystal structures of **TTRO**.

| Selected bond length | Hex@TTRO (Å) | THF@TTRO (Å) | DMF/MeOH@TTRO (Å) | Non@TTRO (Å) |
|----------------------|--------------|--------------|-------------------|--------------|
| C1-C3                | 1.445        | 1.450        | 1.442             | 1.434        |
| C1-C2                | 1.432        | 1.427        | 1.432             | 1.429        |
| C2-C3                | 1.438        | 1.438        | 1.438             | 1.435        |
| C1-C4                | 1.363        | 1.361        | 1.357             | 1.372        |
| C3-C5                | 1.346        | 1.339        | 1.341             | 1.357        |
| C2-C6                | 1.351        | 1.357        | 1.353             | 1.352        |

**Table S7.** Photophysical properties of different **TTRO** crystals.

| Entry         | $\lambda_{\text{ex}}$<br>(nm) | $\lambda_{\text{em}}$<br>(nm) | $\Phi_{\text{F}}^{[\text{a}]}$<br>(%) | $\tau$<br>(ns) | $\chi^2$ | $(k_{\text{r}} [10^8 \text{ s}^{-1}], k_{\text{nr}} [10^8 \text{ s}^{-1}])^{[\text{b}]}$ |
|---------------|-------------------------------|-------------------------------|---------------------------------------|----------------|----------|------------------------------------------------------------------------------------------|
| Hex@TTRO      | 408                           | 695                           | 16.1                                  | 2.7            | 1.13     | (0.60, 3.11)                                                                             |
| THF@TTRO      | 395                           | 706                           | 14.6                                  | 2.5            | 1.16     | (0.56, 3.44)                                                                             |
| Non@TTRO      | 365                           | 685                           | -                                     | -              | -        | -                                                                                        |
| DMF/MeOH@TTRO | 380                           | 698                           | 24.1                                  | 1.4            | 1.06     | (1.72, 5.42)                                                                             |

<sup>[\text{a}]</sup>measured by an integrating sphere; <sup>[\text{b}]</sup> $k_{\text{r}}$ : radiative decay rate;  $k_{\text{nr}}$ : nonradiative decay rate.

**Table S8.** Photophysical properties for grounded and fumed **TTRO** samples.

| Entry          | $\lambda_{\text{em}}$<br>(nm) | $\Phi_{\text{F}}^{[\text{a}]}$<br>(%) | $\tau$<br>(ns) | $\tau_1$<br>(ns) | $\tau_1$<br>(ns) | $\tau_3$<br>(ns) | $\chi^2$ |
|----------------|-------------------------------|---------------------------------------|----------------|------------------|------------------|------------------|----------|
| <b>TTRO-G2</b> | 745                           | 1.3                                   | 3.6            | 1.2(72.9%)       | 3.8(15.0%)       | 18.2(18.1%)      | 1.03     |
| <b>TTRO-G3</b> | 782                           | <0.1                                  | -              | -                | -                | -                | -        |
| <b>TTRO-F3</b> | 735                           | 3.1                                   | 2.6            | 0.8(77.1%)       | 3.4(13.3%)       | 15.5 (9.6%)      | 1.09     |

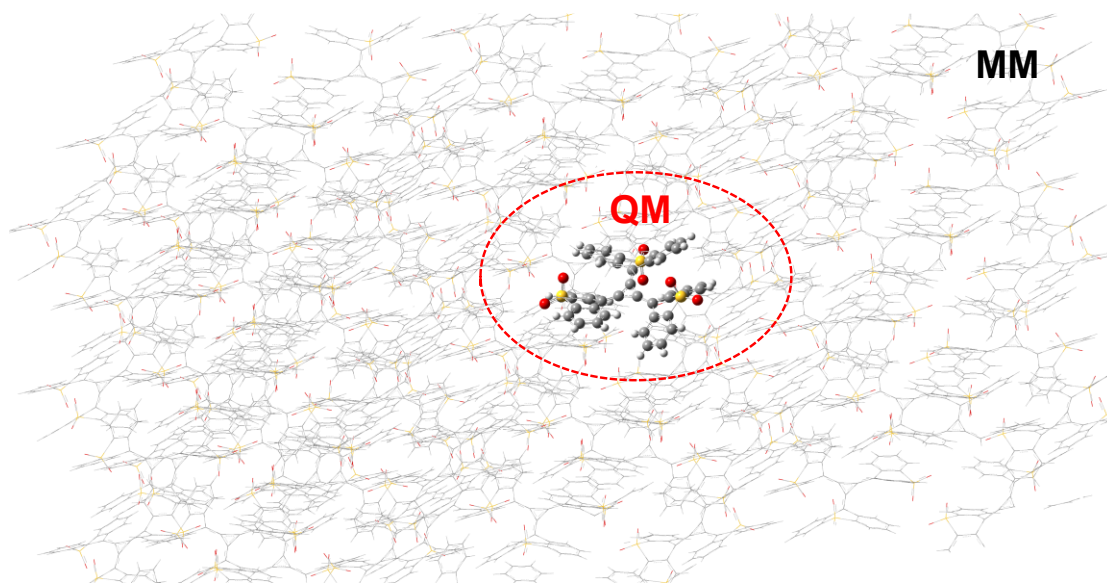

**Figure S23.** QM/MM model of **TTRO** for **Hex@TTRO** as an example. 108 molecules are included and the central one is treated as QM part and the surrounding one acts as the MM parts. In geometry optimization, the QM part is active and the MM part is frozen.

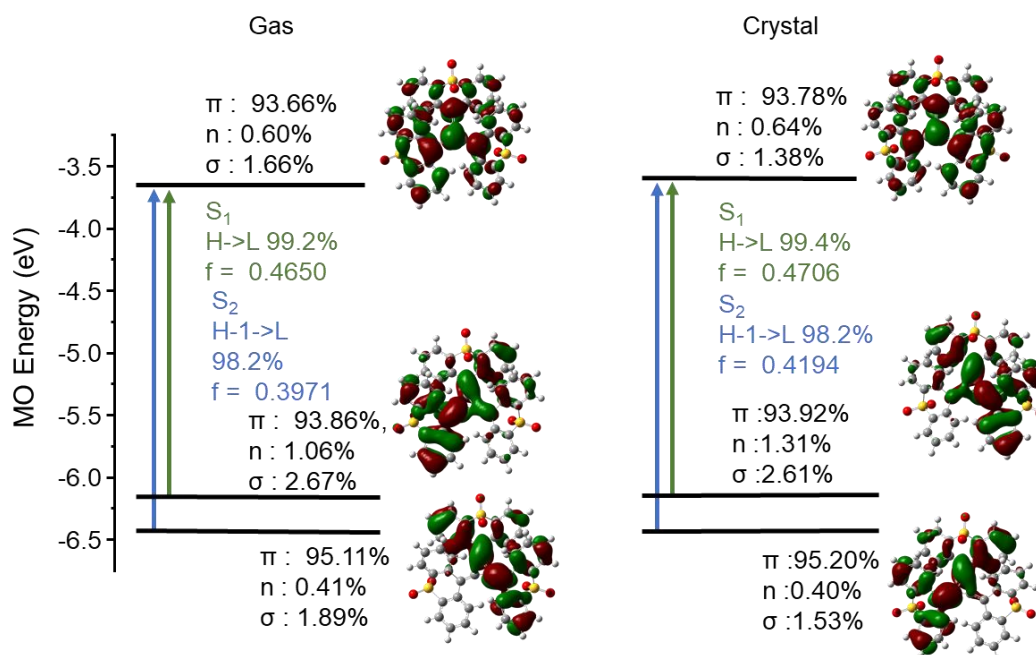

**Figure S24** Involved molecular frontier orbital and their energy levels, transition property of the  $S_1$  state and the oscillator strengths at the  $S_0$ -geometry in the gas and crystalline phases.

**Table S9.** Calculated vertical transition energy ( $E$ ) and oscillator strength ( $f$ ) and transition orbitals (TOs) of **TTRO** at the  $S_0$ -geometry in both the gas and solid phases.

| $S_0$<br>geometry | $S_1$  |                      |                     | $S_2$  |                      |                     |
|-------------------|--------|----------------------|---------------------|--------|----------------------|---------------------|
|                   | $f$    | $E(\text{eV})$       | Transition orbitals | $f$    | $E(\text{eV})$       | Transition orbitals |
| Gas               | 0.4650 | 2.3508/<br>527.41 nm | H -> L<br>99.2%     | 0.3971 | 2.5551/<br>485.24 nm | H-1 -> L<br>98.2%   |
| Crystal           | 0.4706 | 2.3402/<br>529.80 nm | H->L<br>99.4%       | 0.4194 | 2.5541/<br>485.43 nm | H-1->L<br>98.2%     |

**Table S10.** Calculated vertical transition energy (E) and oscillator strength (f) and transition orbitals (TOs) of **TTRO** at the S<sub>1</sub>-geometry in both the gas and solid phases.

| S <sub>1</sub><br>geometry | S <sub>1</sub> |                      |                        | S <sub>2</sub> |                     |                        |
|----------------------------|----------------|----------------------|------------------------|----------------|---------------------|------------------------|
|                            | f              | E(eV)<br>nm          | Transition<br>orbitals | f              | E(eV)<br>nm         | Transition<br>orbitals |
| Gas                        | 0.1577         | 1.2062/1027.89<br>nm | H -> L<br>107.4%       | 0.3495         | 1.9881/623.63<br>nm | H-1 -> L<br>99.9%      |
| Crystal                    | 0.3864         | 1.8368/675.00<br>nm  | H -> L<br>101.6%       | 0.3850         | 2.1837/567.77<br>nm | H-1 -> L<br>98.9%      |

## References

- [S1] Spek, A., Single-crystal structure validation with the program PLATON. *J. Appl. Cryst.* **2003**, 36, 7-13.
- [S2] Gaussian 16, Revision A.03, M. J. Frisch, G. W. Trucks, H. B. Schlegel, G. E. Scuseria, M. A. Robb, J. R. Cheeseman, G. Scalmani, V. Barone, G. A. Petersson, H. Nakatsuji, X. Li, M. Caricato, A. V. Marenich, J. Bloino, B. G. Janesko, R. Gomperts, B. Mennucci, H. P. Hratchian, J. V. Ortiz, A. F. Izmaylov, J. L. Sonnenberg, D. Williams-Young, F. Ding, F. Lipparini, F. Egidi, J. Goings, B. Peng, A. Petrone, T. Henderson, D. Ranasinghe, V. G. Zakrzewski, J. Gao, N. Rega, G. Zheng, W. Liang, M. Hada, M. Ehara, K. Toyota, R. Fukuda, J. Hasegawa, M. Ishida, T. Nakajima, Y. Honda, O. Kitao, H. Nakai, T. Vreven, K. Throssell, J. A. Montgomery, Jr., J. E. Peralta, F. Ogliaro, M. J. Bearpark, J. J. Heyd, E. N. Brothers, K. N. Kudin, V. N. Staroverov, T. A. Keith, R. Kobayashi, J. Normand, K. Raghavachari, A. P. Rendell, J. C. Burant, S. S. Iyengar, J. Tomasi, M. Cossi, J. M. Millam, M. Klene, C. Adamo, R. Cammi, J. W. Ochterski, R. L. Martin, K. Morokuma, O. Farkas, J. B. Foresman, and D. J. Fox, Gaussian, Inc., Wallingford CT, (2016).
- [S3] Lu, T., A comprehensive electron wavefunction analysis toolbox for chemists, Multiwfn. *J. Chem. Phys.*, 161, 082503 (2024) DOI: 10.1063/5.0216272.
- [S4] Lu, T.; Chen, F., Multiwfn: a multifunctional wavefunction analyzer. *J. Comput. Chem.* **2012**, 33, 580-92.
- [S5] Grimme S, Ehrlich S, Goerigk L. Effect of the damping function in dispersion corrected density functional theory[J]. *J. Comput. Chem.*, **2011**, 32: 1456-1465.
- [S6] Grimme S, Antony J, Ehrlich S, et al. A consistent and accurate ab initio parametrization of density functional dispersion correction (DFT-D) for the 94 elements H-Pu[J]. *J. Chem. Phys.*, **2010**, 132, 154104.

- [S7] Weigend F, Ahlrichs R. Balanced basis sets of split valence, triple zeta valence and quadruple zeta valence quality for H to Rn: Design and assessment of accuracy[J]. *Phys. Chem. Chem. Phys.*, **2005**, 7: 3297-3305.
- [S8] Weigend F. Accurate Coulomb-fitting basis sets for H to Rn[J]. *Phys. Chem. Chem. Phys.*, **2006**, 8: 1057-1065.
- [S9] Lu T, Chen Q. Independent gradient model based on Hirshfeld partition: A new method for visual study of interactions in chemical systems[J]. *J. Comput. Chem.*, **2022**, 43: 539-555.
- [S10] Humphrey, W.; Dalke, A.; Schulten, K., VMD: Visual molecular dynamics. *J. Mol. Graphics* **1996**, 14, 33-38.
- [S11] Sarma, D.; Majumdar, B.; Sarma, T. K., Visible-light induced enhancement in the multi-catalytic activity of sulfated carbon dots for aerobic carbon–carbon bond formation. *Green Chem.* **2019**, 21, 6717-6726.
